# Supplementary material for: Paramagnetic nanofibrous composite films enhance the osteogenic responses of pre-osteoblast cells
Source: Royal Society of Chemistry journal article supplement (doi:10.1039/c0nr00178c), 2010-01-01
Supplement: c0nr00178c.pdf [file c0nr00178c.pdf]

## Supporting information

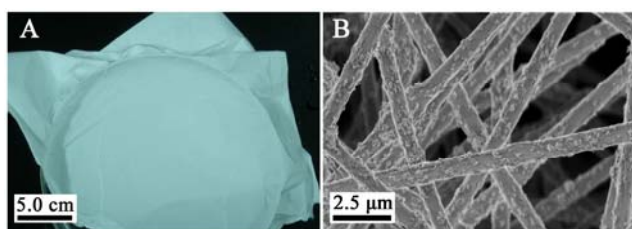

**Figure S1.** The nHA/PLA film was white and displayed similar nano-scale architectures to that of  $\gamma$ -Fe<sub>2</sub>O<sub>3</sub>/nHA/PLA.

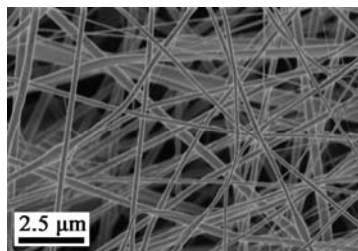

**Figure S2.** Fibres composed of  $\gamma$ -Fe<sub>2</sub>O<sub>3</sub> and PLA have a smooth surface.

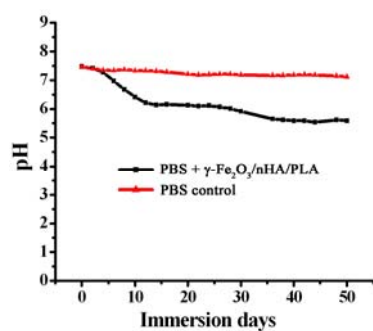

**Figure S3.** The pH value of the PBS buffer solution decreased from 7.4 to 5.5 when the  $\gamma$ -Fe<sub>2</sub>O<sub>3</sub>/nHA/PLA film was immersed in the PBS buffer solution at 37°C for 8 weeks with no fresh buffer replacement.

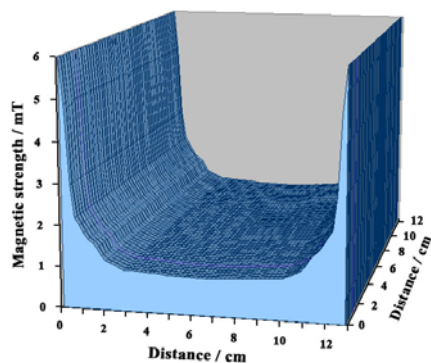

**Figure S4.** The distribution of magnetic field strength in the space where the cells culture plates are placed.

Table S1 BALP concentration of cells cultivated in tissue culture plastic wells (n=3).

| condition                   | BALP concentration (U/L) |
|-----------------------------|--------------------------|
| Tissue culture plastic      | 8.83±0.774               |
| Tissue culture plastic + MF | 8.42±0.436               |
